# Supplementary material for: Synthesis and host–guest properties of an alternating copolymer containing calix[4]arene and calix[6]arene in its main chain
Source: Royal Society of Chemistry journal article supplement (doi:10.1039/b9py00221a), 2009-12-16
Supplement: b9py00221a.pdf [file b9py00221a.pdf]

## **Electronic Supplementary Information**

### **Synthesis and host–guest properties of an alternating copolymer containing calix[4]arene and calix[6]arene in its main chain**

Tomoki Ogoshi\*, Yoko Nishida, Tada-aki Yamagishi and Yoshiaki Nakamoto\*

*Graduate School of Natural Science and Technology, Kanazawa University,  
Kakuma-machi, Kanazawa 920-1192, Japan*

#### **<sup>1</sup>H NMR Spectrum of Poly-1**

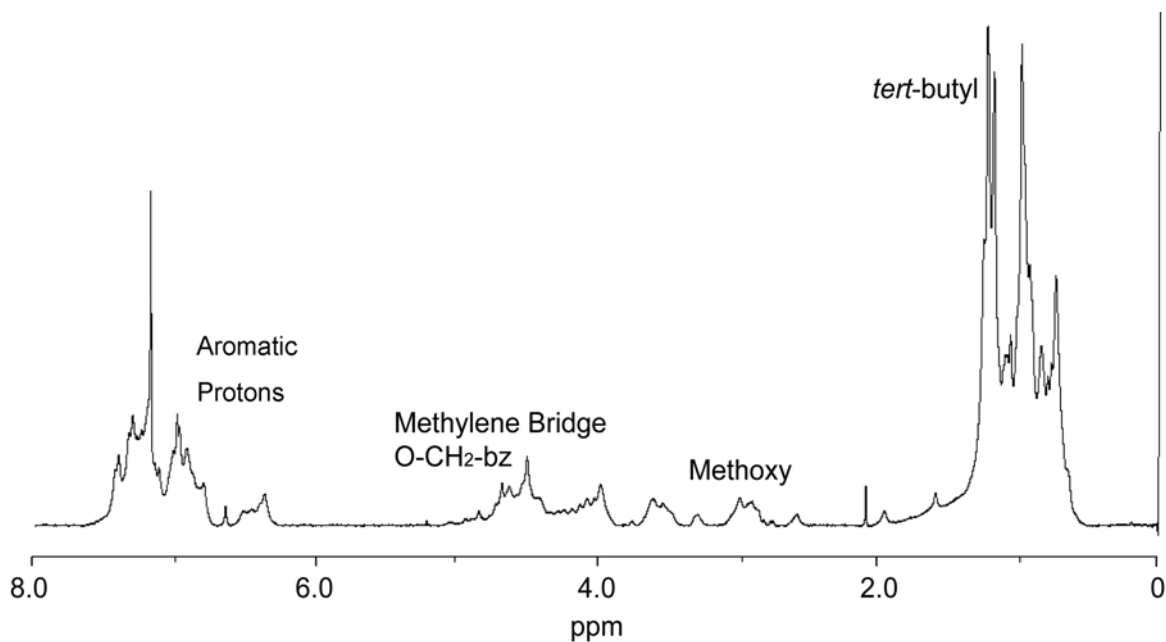

**Fig. S1** (a) <sup>1</sup>H NMR spectrum of the alternating copolymer (**Poly-1**) in CDCl<sub>3</sub>.

**Emission Spectra of Fluoranthene with 1, 2 and Poly-1**

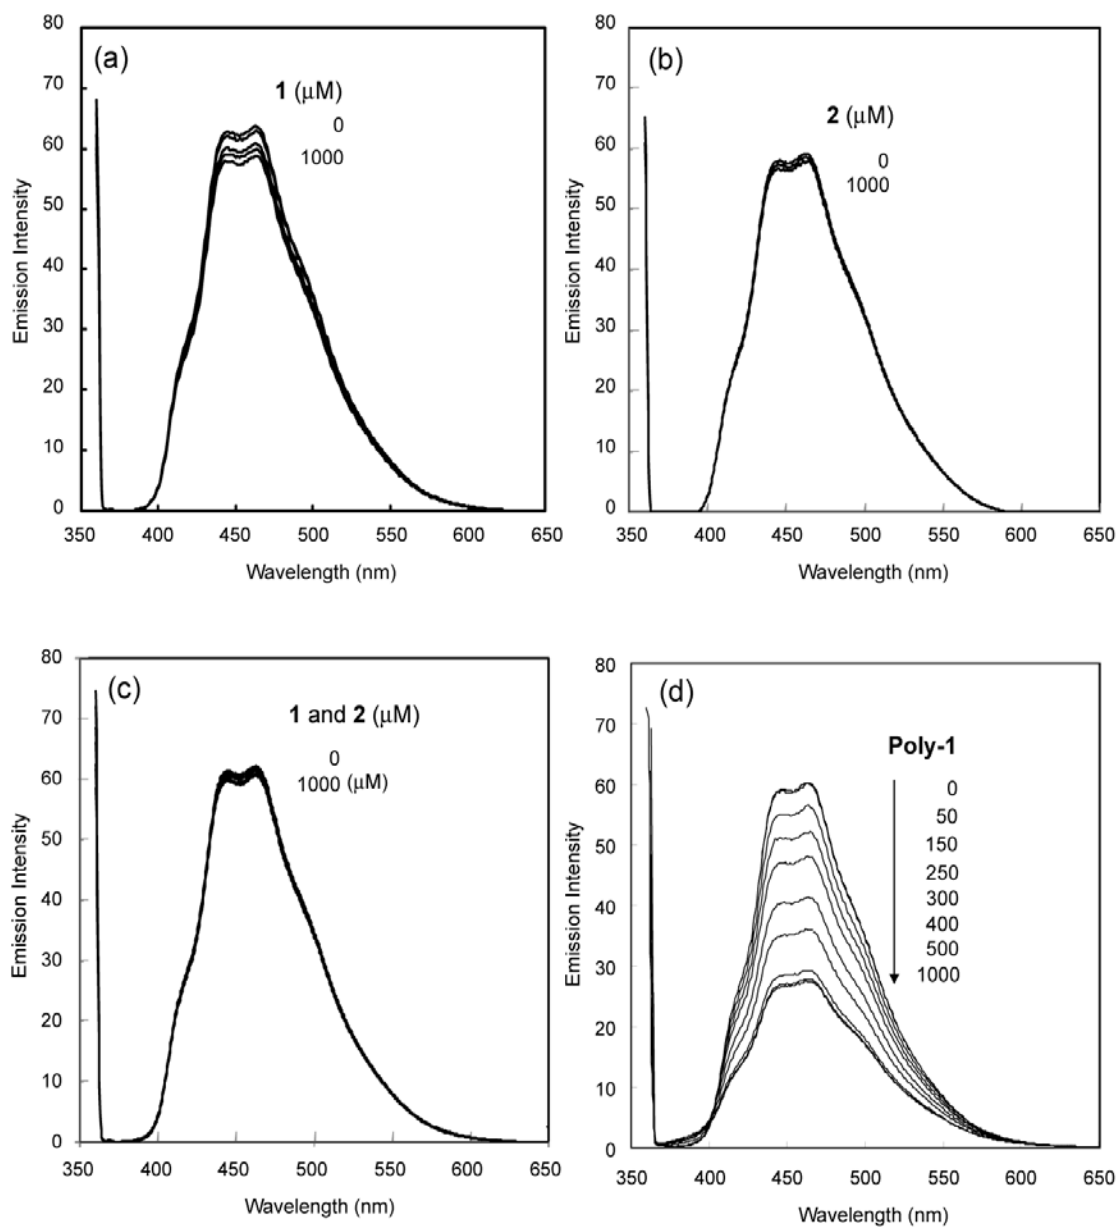

**Fig. S2** Emission spectra of fluoranthene (10  $\mu\text{M}$ ) upon addition of (a) calix[4]arene model (**1**), (b) calix[6]arene model (**2**), (c) both **1** and **2** and (d) **Poly-1** in chloroform (excited at 360 nm).

### Stern-Volmer Plots

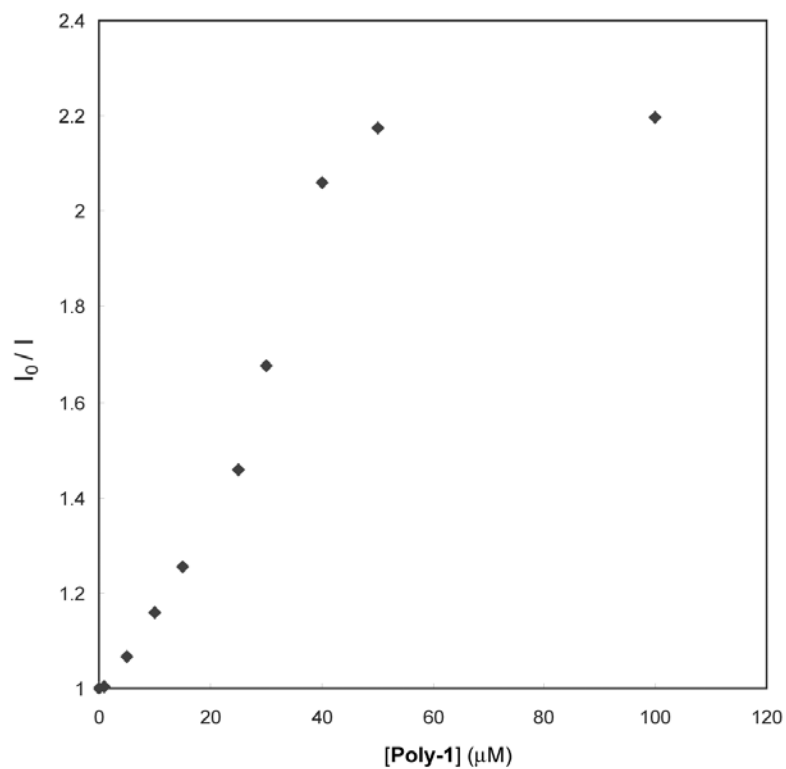

**Fig. S3** Stern–Volmer plots for fluorescence quenching of fluoranthene (10 mM) in chloroform by **Poly-1**. Fluoranthene was excited at 360 nm. The fluorescence intensities were monitored at 462 nm.
